# Supplementary material for: Electrically conductive thermoplastic elastomer nanocomposites at ultralow graphene loading levels for strain sensor applications
Source: Royal Society of Chemistry journal article supplement (doi:10.1039/c5tc02751a), 2015-11-24
Supplement: c5tc02751a1.pdf [file c5tc02751a1.pdf]

## **Electronic Supplementary Information (ESI) for**

### **Electrically Conductive Thermoplastic Elastomer Nanocomposites at Ultralow Graphene Loading Levels for Strain Sensor Applications**

Hu Liu,<sup>1</sup> Yilong Li,<sup>1</sup> Kun Dai,<sup>1,\*</sup> Guoqiang Zheng,<sup>1</sup> Chuntai Liu,<sup>1,\*</sup>

Changyu Shen,<sup>1</sup> Xingru Yan,<sup>2</sup> Jiang Guo,<sup>2</sup> and Zhanhu Guo<sup>2,\*</sup>

<sup>1</sup> School of Materials Science and Engineering,  
The Key Laboratory of Material Processing and Mold of Ministry of Education, Zhengzhou  
University, Zhengzhou, Henan 450001, P.R. China

<sup>2</sup> Integrated Composites Laboratory (ICL),  
Department of Chemical & Biomolecular Engineering,  
University of Tennessee, Knoxville, TN 37996 USA

*\*: Correspondence authors*

Tel.: +86-371-63887969;

E-mail addresses: [kundai@zzu.edu.cn](mailto:kundai@zzu.edu.cn) (K. D.),

[ctliu@zzu.edu.cn](mailto:ctliu@zzu.edu.cn) (CT L), [zguo10@utk.edu](mailto:zguo10@utk.edu) (Z. G.)

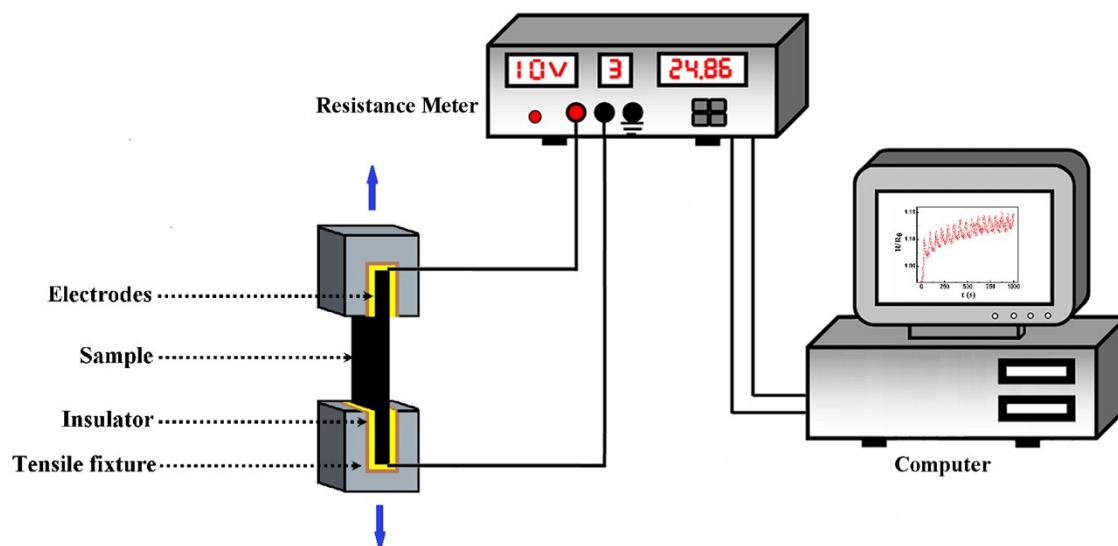

**Fig. S1** Set-up for the simultaneous strain sensing upon cyclic loading (the blue arrows represent the tensile direction).

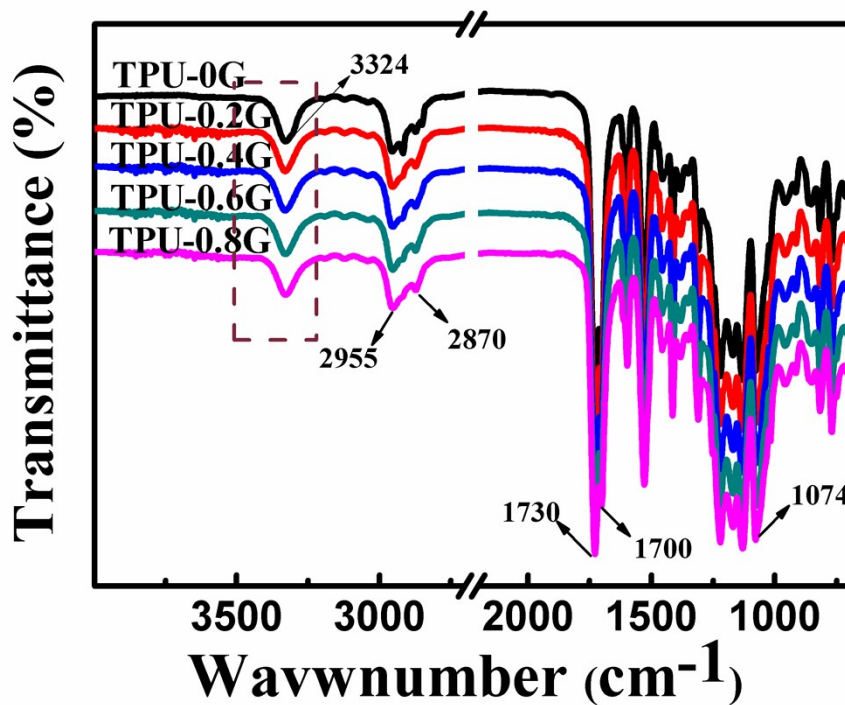

**Figure S2.** FT-IR spectra of neat TPU and its graphene nanocomposites with different graphene contents.

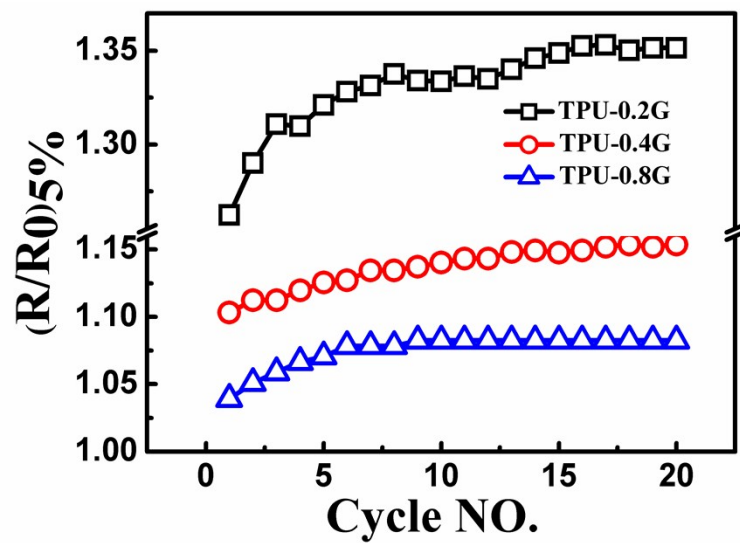

**Fig. S3** The change of  $(R/R_0)_{5\%}$  as a function of cycle number.

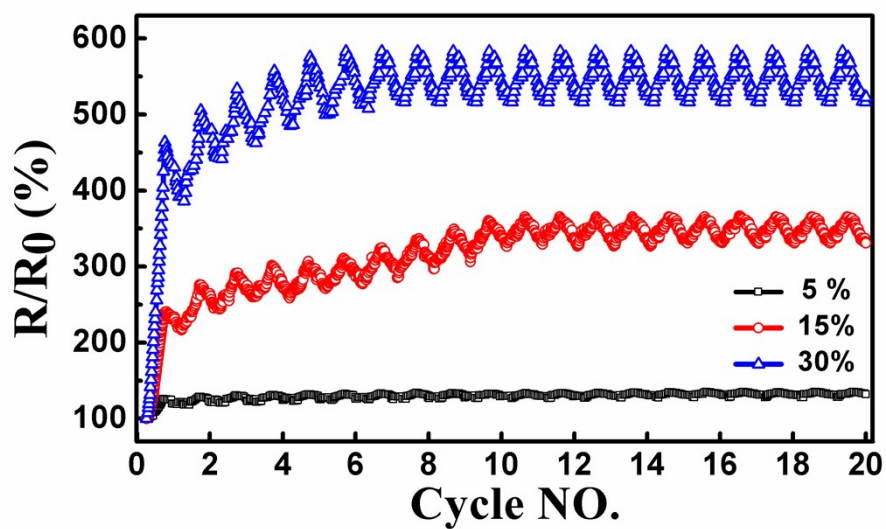

**Fig. S4** Resistance-strain behavior of TPU-0.2G, up to different strain amplitude at the strain rate of  $0.1 \text{ min}^{-1}$ , during cyclic loading (cycle 1-20).

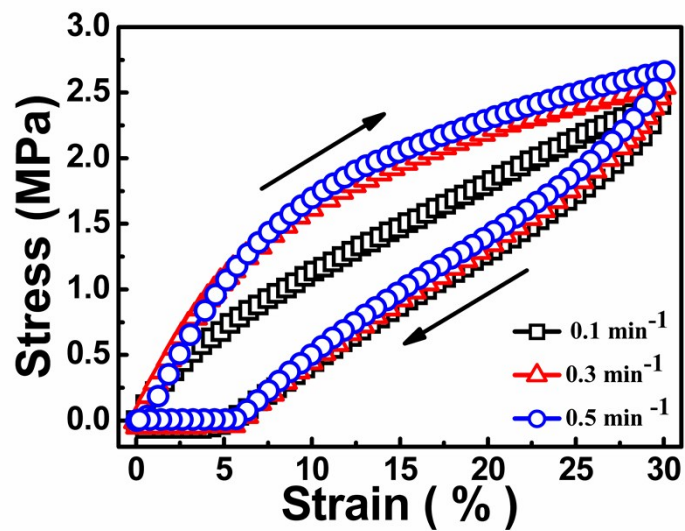

**Fig. S5** Stress-strain behavior of TPU-0.2G at three strain rates during the first cyclic strain test.

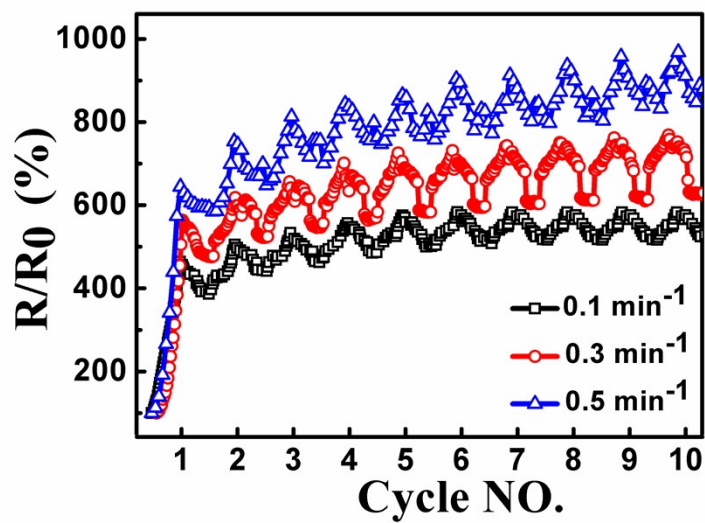

**Fig. S6** Resistance-strain behavior of TPU-0.2G, up to 30% strain at different strain rates, during cyclic loading (cycle 1-10).

**Table S1** Parameters obtained by fitting the experimental data with Equation 7.

|                       | A       | B       | C       | M       | W       | U       | V       |
|-----------------------|---------|---------|---------|---------|---------|---------|---------|
| 0.1 min <sup>-1</sup> | 1.44369 | 1.46983 | 0.01855 | 2.6126  | 0.10596 | 0.10596 | 0.10596 |
| 0.3 min <sup>-1</sup> | 1.46331 | 1.4976  | 0.02077 | 2.75045 | 0.36768 | 0.36768 | 0.36768 |
| 0.5 min <sup>-1</sup> | 1.38308 | 1.37605 | 0.07108 | 2.81029 | 0.34792 | 0.34792 | 0.34792 |
